# Supplementary material
Source: PubMed Central journal article supplement (PMC1785283)

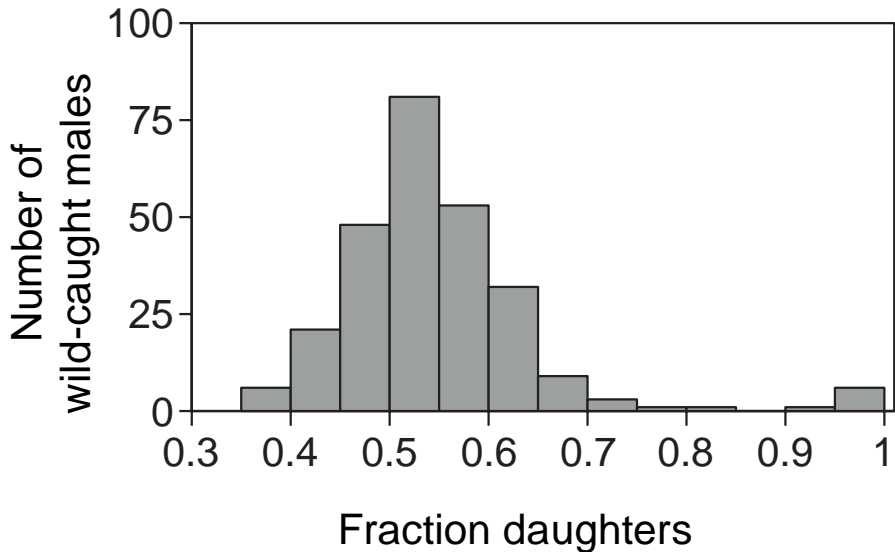

Supplement: pnas_0605578104_1.pdf [file pnas_0605578104_1.pdf]

*run* (25)

*elav* (27)

*yellow* (48)

*vermilion* (116)

*period* (34)

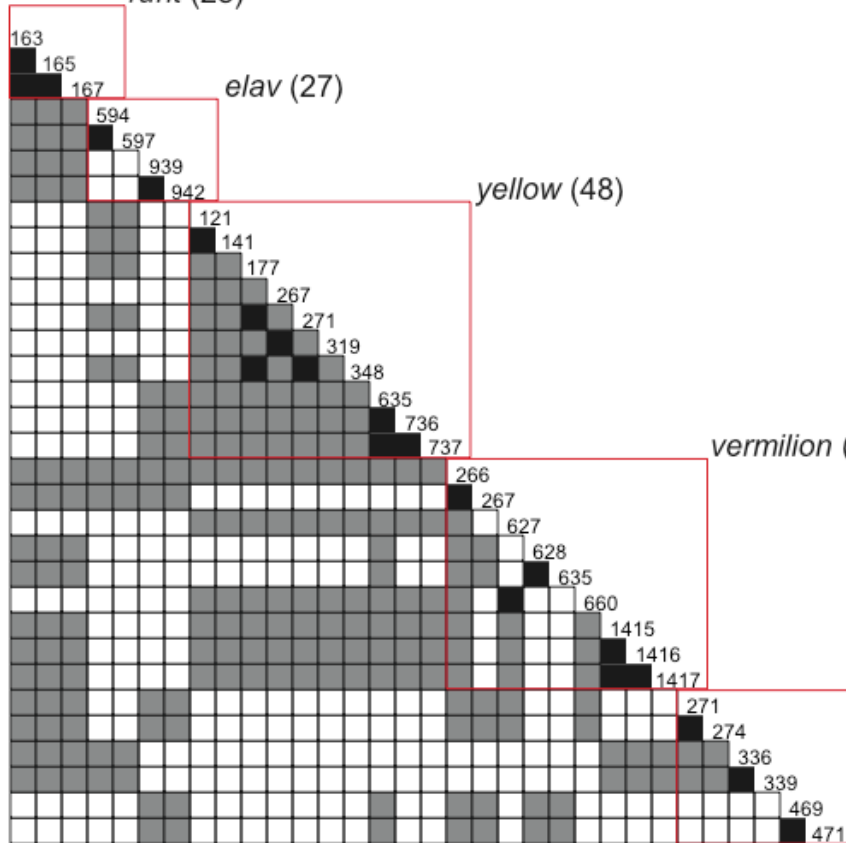

Supplement: pnas_0605578104_2.pdf [file pnas_0605578104_2.pdf]

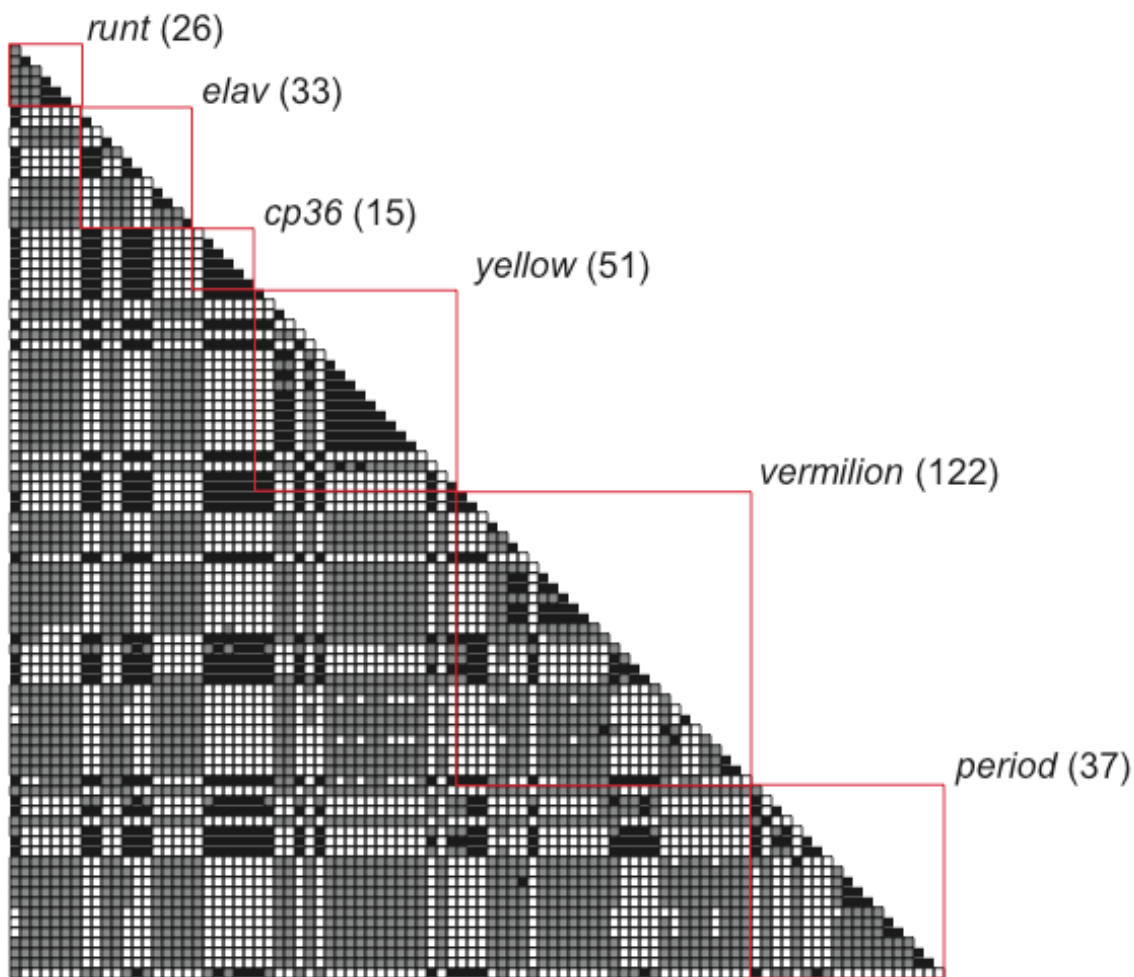

Supplement: pnas_0605578104_3.pdf [file pnas_0605578104_3.pdf]

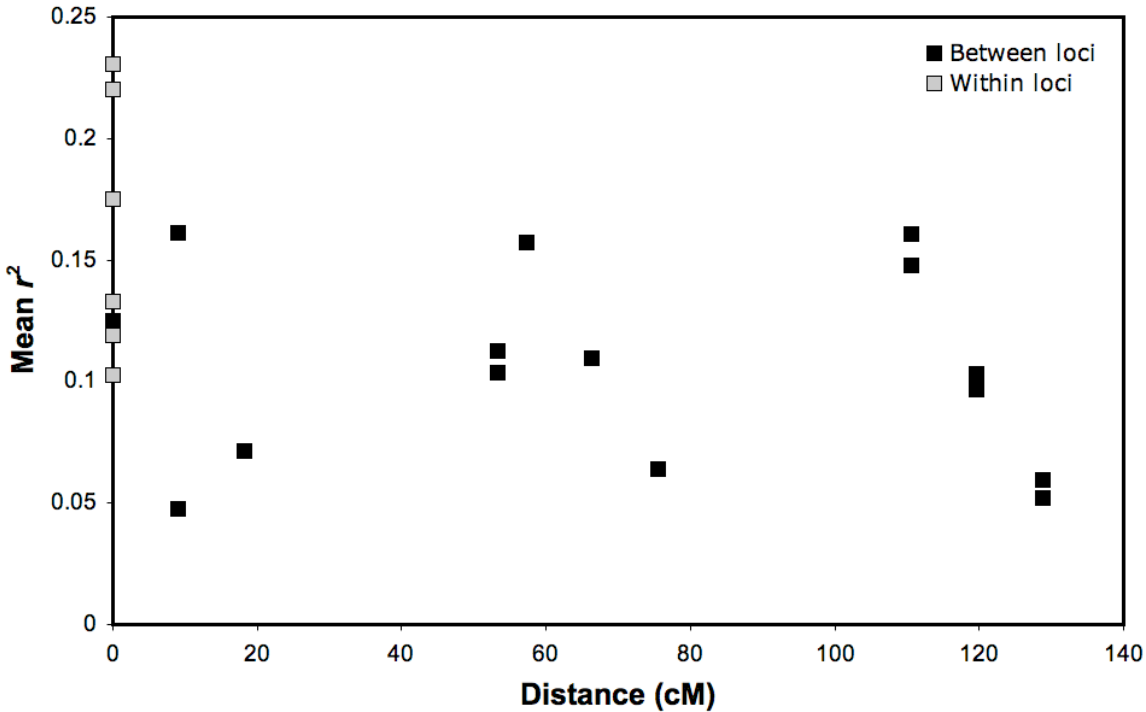

Supplement: pnas_0605578104_4.pdf [file pnas_0605578104_4.pdf]

# A. cp36

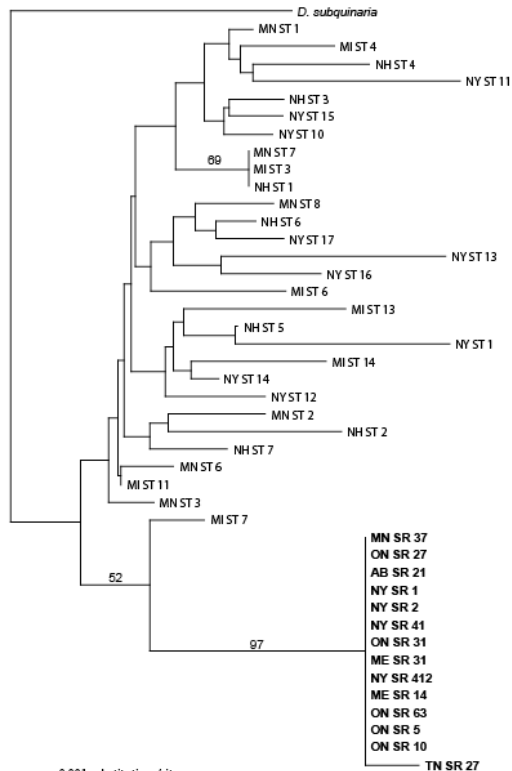

# B. elav

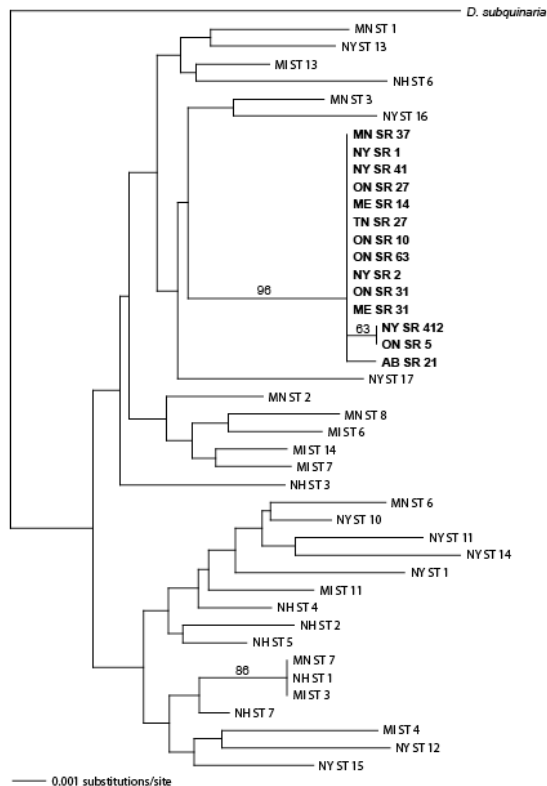

# C. period

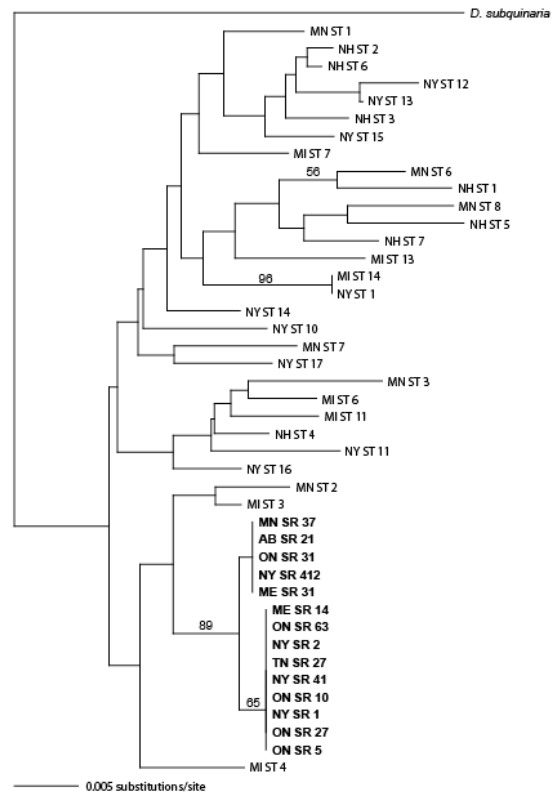

# D. runt

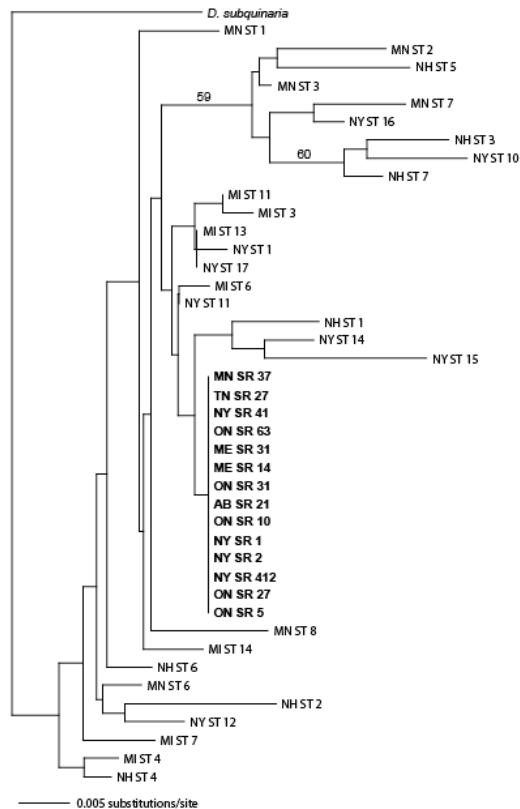

# E. vermilion

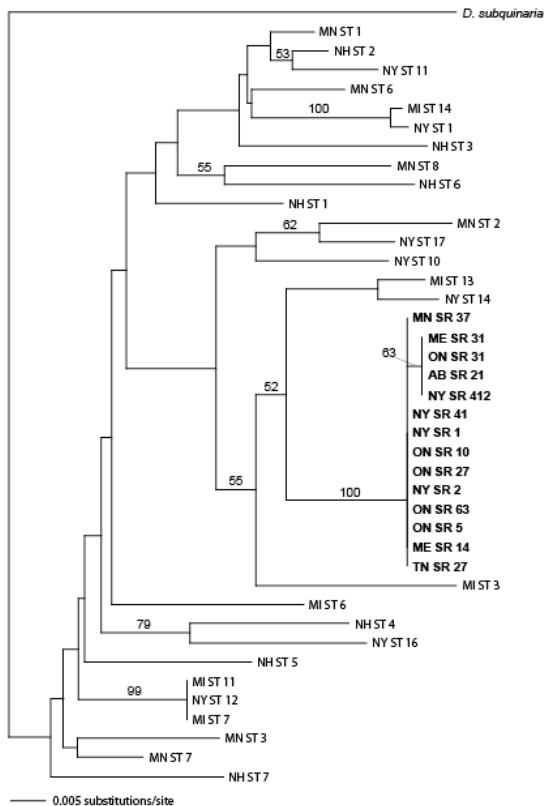

# F. yellow

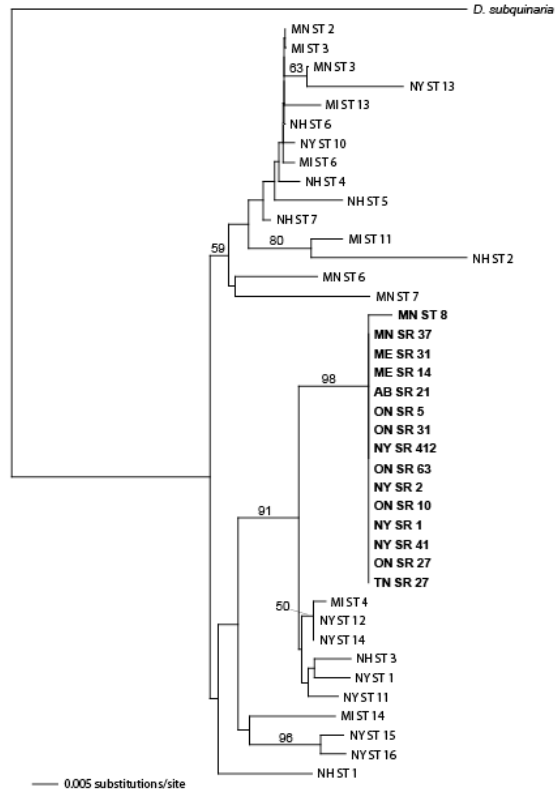

Supplement: pnas_0605578104_5.pdf [file pnas_0605578104_5.pdf]
